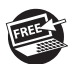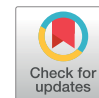

# Prevalence of Diabetes and Regional Differences in Chinese Women Planning Pregnancy: A Nationwide Population-Based Cross-sectional Study

*Diabetes Care* 2017;40:e16–e18 | DOI: 10.2337/dc16-2188

Qiongjie Zhou,<sup>1,2,3</sup> Qiaomei Wang,<sup>4</sup>  
Haiping Shen,<sup>4</sup> Yiping Zhang,<sup>4</sup>  
Shikun Zhang,<sup>4</sup> and Xiaotian Li<sup>1,2,5</sup>

Diabetes is closely linked with women's health, and the Endocrine Society recommends that preconception consulting is provided to all women with diabetes who are considering pregnancy (1). However, the prevalence of hyperglycemia in this population is unknown and identifying diabetes before conception remains a challenge. Risk factor-based screening for type 2 diabetes (including in those of advanced age, who are overweight or obese, and with a family history of type 2 diabetes) in adults is recommended by the U.S. Preventive Services Task Force (2). The occurrence of diabetes is rising in China, where the prevalence of diabetes rose from 2.5% in 1994 to 9.7–11.6% in 2014. We hypothesized that there is a substantial prevalence of hyperglycemia (diabetes and prediabetes), with regional differences, in preconceptional women in China. To address this hypothesis, we analyzed data from the National Free Preconception Health Examination Project (NFPHEP) to quantify hyperglycemia among women with conception intention in China and to determine a more appropriate, tailored screening strategy in this population.

A population-based, cross-sectional, fasting plasma glucose (FPG) survey of

the hyperglycemia rate and its distribution among women planning pregnancy was performed using NFPHEP data, covering 31 provinces in mainland China between 2010 and 2012. Data from 2,094,297 FPG records in 2,120,131 women (age 20–49 years) were analyzed; 1.4% and 12.9% of women had diabetes (FPG  $\geq 7.0$  mmol/L) and prediabetes (FPG 5.6–6.9 mmol/L), respectively, of whom, 7.2% and 1.0% were overweight (BMI 25–29.9 kg/m<sup>2</sup>) and obese (BMI  $\geq 30$  kg/m<sup>2</sup>), respectively. The ratio of self-reported diagnosed diabetes among all identified women was 1.53% (417/27,278), and 80.0% of women with hyperglycemia were without listed risk factors (age  $\geq 35$  years, overweight/obese, multiparity). The prevalence of diabetes and prediabetes within China varied regionally, ranging from 0.1–3.0% and 6.5–24.0%, respectively. After adjustment for risk factors (age, BMI, and parity), the highest and lowest risks were found in Jilin (odds ratio 2.38, 95% CI 2.32–2.45) and Qinghai (0.50, 0.46–0.54), respectively, compared with the median province (Jiangsu) (Fig. 1).

This is a large-scale nationwide public welfare-based study that concerned the

seroepidemiology of preconception hyperglycemia, covered all provinces in the Chinese mainland, enrolled more than 2.2 million Chinese women, and had less than 6% missing data. We reported on the prevalence of hyperglycemia before pregnancy among women with pregnancy intention throughout China for the first time. The low self-report rate provided further evidence that diabetes health care needs improvement in China, especially in rural areas. Also, a routine FPG screening for hyperglycemia is suggested as part of preconception health examinations for all women based on the fact that that only 20% of women with hyperglycemia could be identified based on at least one risk factor (advanced age, being overweight or obese, or multiparity). Moreover, after adjusting for age, BMI, and parity, significant regional differences existed among Chinese women planning pregnancy, with the risk of hyperglycemia in Jilin, Fujian, and Jiangxi provinces being more than twofold higher compared with that in Jiangsu province, whereas that in Qinghai was only half of the risk in Jiangsu. Societal determinants, which are considered to be related to the risk of diabetes in China, could explain these regional differences, with possible

<sup>1</sup>Obstetrics and Gynecology Hospital of Fudan University, Shanghai, China

<sup>2</sup>Shanghai Key Laboratory of Female Reproductive Endocrine-Related Diseases, Fudan University, Shanghai, China

<sup>3</sup>Women's Health and Perinatology Research Group, Department of Clinical Medicine, The Arctic University of Norway, Tromsø, Norway

<sup>4</sup>Department of Maternal and Child Health, National Health and Family Planning Commission of the People's Republic of China, Beijing, China

<sup>5</sup>Institute of Biomedical Sciences, Fudan University, Shanghai, China

Corresponding authors: Xiaotian Li, xiaotianli555@163.com, and Shikun Zhang, yiping791129@163.com.

Received 11 October 2016 and accepted 2 November 2016.

© 2017 by the American Diabetes Association. Readers may use this article as long as the work is properly cited, the use is educational and not for profit, and the work is not altered. More information is available at <http://www.diabetesjournals.org/content/license>.

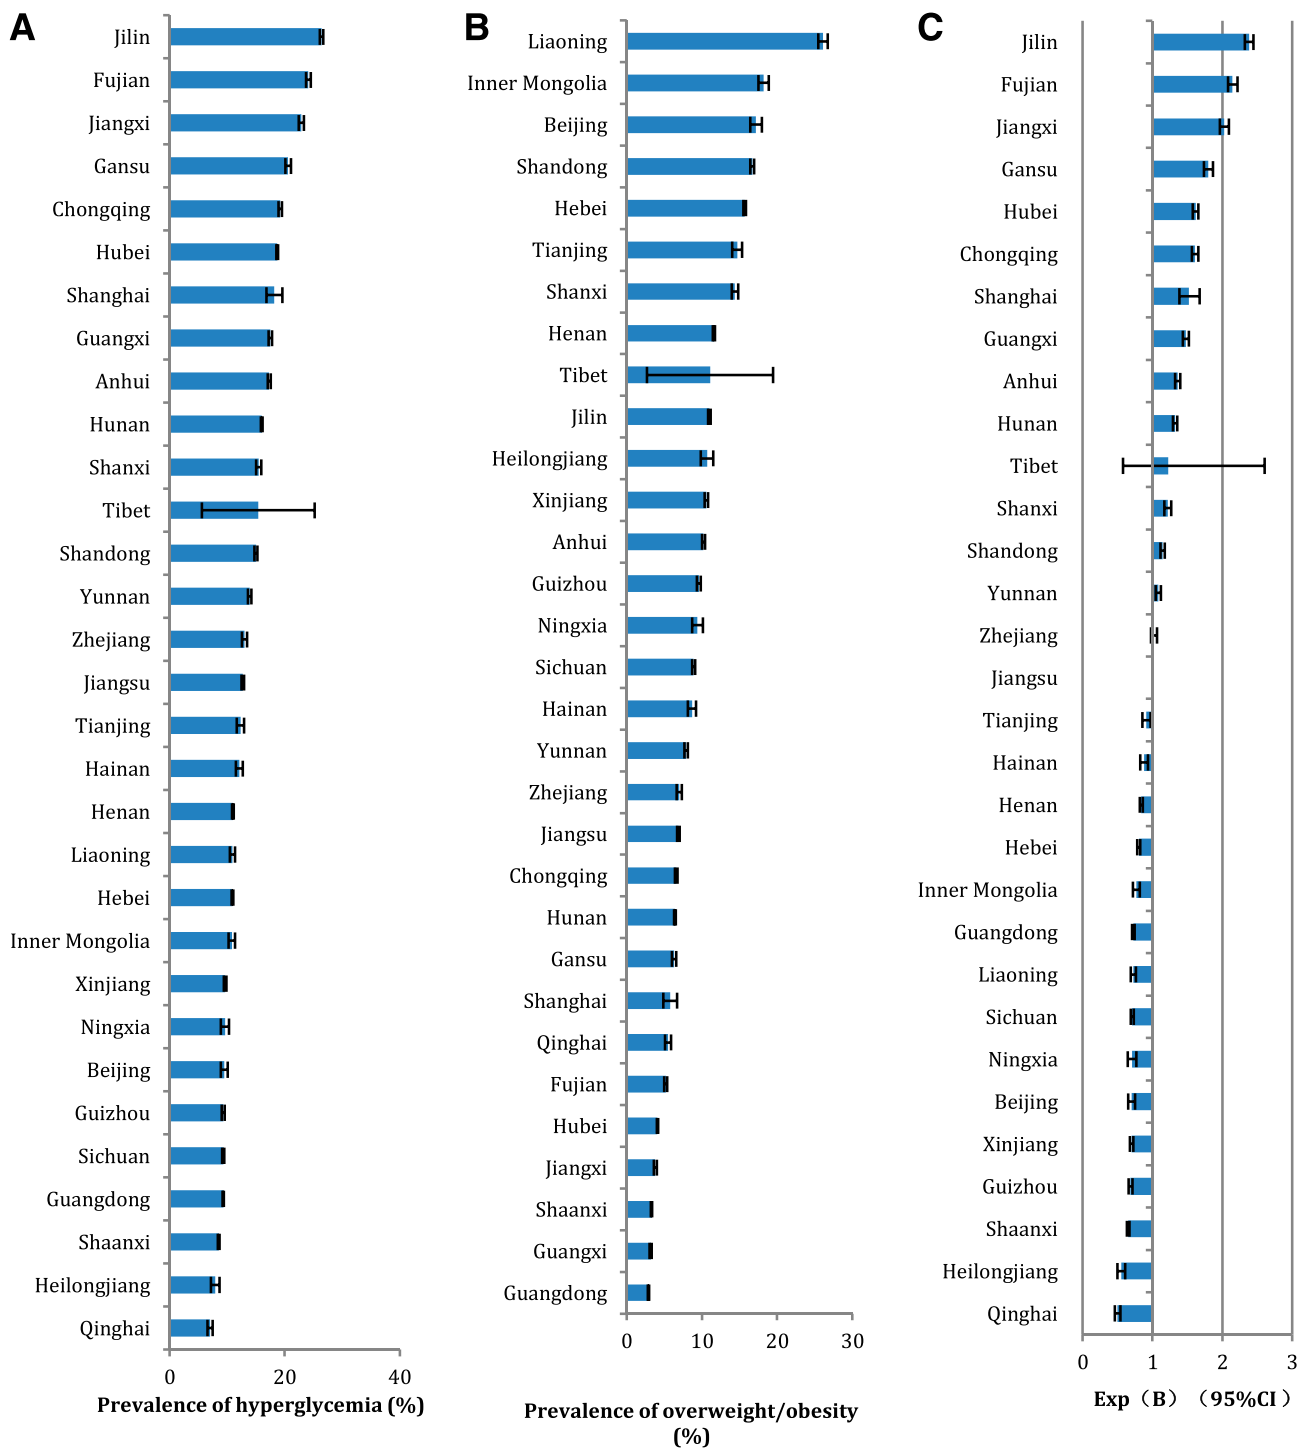

**Figure 1**—A: Rank of hyperglycemia prevalence (diabetes and prediabetes) among women before conception in all 31 provinces of mainland China. B: Rank of overweight and obese prevalence among women before conception in all 31 provinces of mainland China. C: Interprovincial odds ratios (95% CI) for hyperglycemia adjusted for BMI, age, and parity, with Jiangsu as the reference.

reasons including the imbalanced economic development and urbanization in different regions within China, together with reduced physical activity and changes in nutritional intake (3,4). Poor nutrition in utero and during early life, combined with overnutrition in later

life, may contribute to the accelerated epidemic of diabetes (5); in turn, this might explain, at least partly, the regional differences in the prevalence of hyperglycemia among these women who grew up in areas of imbalanced regional economy over the past three

decades. In summary, the considerable hyperglycemia prevalence and regional variations among Chinese women with conception intention identified herein warrant more attention. A routine preconception hyperglycemia screening strategy for all women is suggested

instead of the current risk factor–based screening approach.

---

**Acknowledgments.** The authors thank the health workers in the 220 counties of the 31 provinces for their strong collaboration and great efforts made as part of the National Free Preconception Health Examination Project.

**Funding.** This study was funded by the Chinese Association of Maternal and Child Health Studies (AMCHS-2014-4).

The views expressed in the report are those of the authors and do not necessarily reflect the official policy or position of the Department of Maternal and Child Health of the National

Health and Family Planning Commission of the People's Republic of China.

**Duality of Interest.** No potential conflicts of interest relevant to this article were reported.

**Author Contributions.** Q.Z. and X.L. carried out the statistical analyses and drafted the manuscript. Q.W., H.S., S.Z., and X.L. participated in the design and coordination of the study. All authors have read and approved the final manuscript. X.L. is the guarantor of this work and, as such, had full access to all the data in the study and takes responsibility for the integrity of the data and the accuracy of the data analysis.

**Prior Presentation.** This study was presented in abstract form at the 20th Scientific Meeting of the Chinese Diabetes Society, Xiamen, China, 16–19 November 2016.

## References

1. Blumer I, Hadden E, Hadden DR, et al. Diabetes and pregnancy: an endocrine society clinical practice guideline. *J Clin Endocrinol Metab* 2013;98:4227–4249
2. American Diabetes Association. Standards of medical care in diabetes–2014. *Diabetes Care* 2014;37(Suppl. 1):S14–S80
3. Ma RC, Lin X, Jia W. Causes of type 2 diabetes in China. *Lancet Diabetes Endocrinol* 2014;2:980–991
4. Chan JC, Zhang Y, Ning G. Diabetes in China: a societal solution for a personal challenge. *Lancet Diabetes Endocrinol* 2014;2:969–979
5. Hu FB. Globalization of diabetes: the role of diet, lifestyle, and genes. *Diabetes Care* 2011;34:1249–1257
